# Supplementary material for: Sialylated and sulfated N-Glycans in MDCK and engineered MDCK cells for influenza virus studies
Source: PubMed Central journal article supplement (PMC9325728; doi:10.1038/s41598-022-16605-5), 2022-07-26
Supplement: 41598_2022_16605_MOESM1_ESM.pdf [file 41598_2022_16605_MOESM1_ESM.pdf]

Supplementary Table 1

List of assigned peaks of N-glycans by MALDI-TOF-MS analysis in cell lines

| Composition              | MDCK       |        | SIAT1      |        | hCK        |        | Remarks                   |
|--------------------------|------------|--------|------------|--------|------------|--------|---------------------------|
|                          | Mass (m/z) | %      | Mass (m/z) | %      | Mass (m/z) | %      |                           |
| Hex5 HexNAc2             | 1579.8     | 50.03  | 1579.9     | 20.96  | 1579.9     | 43.64  |                           |
| Fuc1 Hex3 HexNAc3        | 1590.8     | 1.35   | 1590.9     | 0.89   | 1591.0     | 3.14   |                           |
| Hex4 HexNAc3             | 1620.9     | 0.84   | 1620.9     | 0.25   | 1621.0     | 2.55   |                           |
| Hex6 HexNAc2             | 1784.0     | 57.73  | 1784.1     | 55.89  | 1784.2     | 64.88  |                           |
| Fuc1 Hex4 HexNAc3        | 1795.1     | 1.84   | 1795.1     | 0.43   | 1795.2     | 3.58   |                           |
| Fuc1 Hex3 HexNAc4        | 1836.1     | 8.11   | 1836.2     | 5.51   | 1836.3     | 12.58  |                           |
| Hex4 HexNAc4             | 1866.1     | 1.03   | 1866.2     | 0.90   | 1866.3     | 1.90   |                           |
| Hex3 HexNAc5             | 1907.2     | 0.93   | 1907.3     | 0.95   | 1907.3     | 4.31   |                           |
| Fuc2 Hex4 HexNAc3        | 1968.2     | 0.55   | 1968.3     | 0.57   | 1968.3     | 0.38   |                           |
| NeuAc1 Hex4 HexNAc3      | 1982.3     | 0.83   | 1982.4     | 0.97   | 1982.4     | 4.24   |                           |
| Hex7 HexNAc2             | 1988.2     | 65.65  | 1988.3     | 52.65  | 1988.4     | 73.28  |                           |
| Fuc1 Hex4 HexNAc4        | 2040.3     | 1.76   | 2040.4     | 1.18   | 2040.5     | 2.35   |                           |
| Hex5 HexNAc4             | 2070.3     | 5.64   | 2070.4     | 5.26   | 2070.5     | 5.31   |                           |
| Fuc1 Hex3 HexNAc5        | 2081.3     | 7.00   | 2081.4     | 5.37   | 2081.5     | 14.62  |                           |
| Hex4 HexNAc5             | 2111.3     | 1.43   | 2111.4     | 0.83   | 2111.5     | 1.71   |                           |
| NeuAc1 Fuc1 Hex4 HexNAc3 | 2156.4     | 4.09   | 2156.5     | 2.88   | 2156.5     | 17.68* | *Sialylated product       |
| NeuAc1 Hex5 HexNAc3      | 2186.4     | 4.88   | 2186.5     | 5.33   | 2186.6     | 6.42   |                           |
| Hex8 HexNAc2             | 2192.4     | 93.62  | 2192.5     | 88.87  | 2192.5     | 88.59  |                           |
| Fuc2 Hex4 HexNAc4        | 2214.4     | 1.37   | 2213.5     | 1.09   | 2213.5     | 0.72   |                           |
| NeuAc1 Hex4 HexNAc4      | 2227.4     | 0.98   | 2227.5     | 1.22   | 2227.6     | 3.18   |                           |
| Fuc1 Hex5 HexNAc4        | 2244.4     | 5.61   | 2244.5     | 4.60   | 2244.6     | 5.61   |                           |
| Hex6 HexNAc4             | 2274.4     | 2.59   | 2274.5     | 1.45   | 2274.6     | 1.31   |                           |
| Fuc1 Hex4 HexNAc5        | 2285.4     | 2.62   | 2285.5     | 1.07   | 2285.6     | 2.81   |                           |
| Hex5 HexNAc5             | 2315.4     | 3.77   | 2315.6     | 0.75   | 2314.6     | 0.93   |                           |
| Fuc1 Hex3 HexNAc6        | 2326.6     | 2.95   | 2326.7     | 2.38   | 2326.7     | 9.37   |                           |
| NeuAc1 Hex6 HexNAc3      | 2390.5     | 7.70   | 2390.6     | 10.90  | 2390.7     | 7.30   |                           |
| Hex9 HexNAc2             | 2396.5     | 100.00 | 2396.7     | 100.00 | 2396.7     | 100.00 | <b>Relative Intensity</b> |
| NeuAc1 Fuc1 Hex4 HexNAc4 | 2402.4     | 1.76   | 2402.6     | 2.37   | 2401.6     | 9.16   |                           |
| Fuc2 Hex5 HexNAc4        | 2418.5     | 1.32   | 2417.6     | 2.00   | 2417.7     | 1.97   |                           |
| NeuAc1 Hex5 HexNAc4      | 2431.5     | 3.43   | 2431.6     | 4.89   | 2431.7     | 5.65   |                           |
| Fuc1 Hex5 HexNAc5        | 2489.5     | 6.20   | 2489.6     | 0.94   | 2489.7     | 1.21   |                           |
| Hex6 HexNAc5             | 2519.5     | 2.12   | 2519.6     | 0.49   | 2519.7     | 0.75   |                           |
| Fuc3 Hex5 HexNAc4        | 2592.5     | 1.72   | 2591.6     | 1.37   | 2591.7     | 1.31   |                           |
| NeuAc1 Fuc1 Hex5 HexNAc4 | 2605.5     | 6.23   | 2605.7     | 7.62   | 2605.8     | 9.61*  | *Sialylated product       |

| Composition                                                              | MDCK       |       | SIAT1      |        | hCK        |        | Remarks                      |
|--------------------------------------------------------------------------|------------|-------|------------|--------|------------|--------|------------------------------|
|                                                                          | Mass (m/z) | %     | Mass (m/z) | %      | Mass (m/z) | %      |                              |
| NeuAc <sub>1</sub> Fuc <sub>1</sub> Hex <sub>5</sub> HexNAc <sub>4</sub> | 2635.5     | 7.35  | 2635.7     | 5.77   | 2635.8     | 3.90   |                              |
| NeuAc <sub>1</sub> Hex <sub>6</sub> HexNAc <sub>4</sub>                  |            |       |            |        |            |        |                              |
| NeuAc <sub>1</sub> Fuc <sub>1</sub> Hex <sub>4</sub> HexNAc <sub>5</sub> | 2646.5     | 2.09  | 2646.7     | 4.31*  | 2646.8     | 8.25*  | *Sialylated bisected product |
| Fuc <sub>2</sub> Hex <sub>5</sub> HexNAc <sub>5</sub>                    | 2663.5     | 2.79  | 2662.7     | 1.54   | 2662.7     | 0.98   |                              |
| NeuAc <sub>1</sub> Hex <sub>5</sub> HexNAc <sub>5</sub>                  | 2677.5     | 1.86  | 2676.7     | 2.35   | 2676.8     | 2.02   |                              |
| Fuc <sub>1</sub> Hex <sub>6</sub> HexNAc <sub>5</sub>                    | 2693.5     | 6.63  | 2693.6     | 0.54   | 2693.8     | 0.95   |                              |
| Fuc <sub>1</sub> Hex <sub>5</sub> HexNAc <sub>6</sub>                    | 2734.5     | 0.82  | 2734.6     | 0.30   | 2734.8     | 1.02   |                              |
| Hex <sub>6</sub> HexNAc <sub>6</sub>                                     | 2764.1     | 0.12  | 2764.4     | 0.10   | 2764.8     | 0.64   |                              |
| NeuAc <sub>1</sub> Fuc <sub>2</sub> Hex <sub>5</sub> HexNAc <sub>4</sub> | 2779.5     | 3.67  | 2778.7     | 1.99   | 2778.8     | 1.37   |                              |
| NeuAc <sub>2</sub> Hex <sub>5</sub> HexNAc <sub>4</sub>                  | 2792.4     | 0.68  | 2792.7     | 7.04   | 2792.8     | 6.87   |                              |
| NeuAc <sub>1</sub> Fuc <sub>1</sub> Hex <sub>6</sub> HexNAc <sub>4</sub> | 2809.6     | 13.34 | 2809.4     | 0.28   | 2809.8     | 1.98   |                              |
| Fuc <sub>3</sub> Hex <sub>5</sub> HexNAc <sub>5</sub>                    | 2837.5     | 2.33  | 2836.7     | 3.34   | 2836.8     | 1.23   |                              |
| NeuAc <sub>1</sub> Fuc <sub>1</sub> Hex <sub>5</sub> HexNAc <sub>5</sub> | 2850.5     | 4.79  | 2850.7     | 5.76   | 2850.8     | 4.52   |                              |
| Fuc <sub>2</sub> Hex <sub>6</sub> HexNAc <sub>5</sub>                    | 2867.5     | 8.98  | 2866.6     | 0.97   | 2866.8     | 0.66   |                              |
| NeuAc <sub>1</sub> Hex <sub>6</sub> HexNAc <sub>5</sub>                  | 2880.5     | 2.72  | 2880.7     | 2.40   | 2880.8     | 1.96   |                              |
| Fuc <sub>1</sub> Hex <sub>6</sub> HexNAc <sub>6</sub>                    | 2938.5     | 1.70  | 2938.7     | 0.86   | 2938.8     | 0.67   |                              |
| NeuAc <sub>1</sub> Fuc <sub>3</sub> Hex <sub>5</sub> HexNAc <sub>4</sub> | 2953.5     | 0.90  | 2952.7     | 1.79   | 2952.8     | 1.13   |                              |
| NeuAc <sub>2</sub> Fuc <sub>1</sub> Hex <sub>5</sub> HexNAc <sub>4</sub> | 2966.5     | 7.42  | 2966.7     | 17.23* | 2966.8     | 22.40* | *Sialylated product          |
| NeuAc <sub>1</sub> Fuc <sub>2</sub> Hex <sub>5</sub> HexNAc <sub>5</sub> | 3024.5     | 2.20  | 3023.6     | 2.14   | 3024.7     | 0.87   |                              |
| NeuAc <sub>2</sub> Hex <sub>5</sub> HexNAc <sub>5</sub>                  | 3037.5     | 0.86  | 3037.6     | 6.64*  | 3037.7     | 2.05   | *Sialylated/bisected product |
| Fuc <sub>3</sub> Hex <sub>6</sub> HexNAc <sub>5</sub>                    | 3040.5     | 1.60  | 3040.5     | 1.87   | 3040.7     | 0.57   |                              |
| NeuAc <sub>1</sub> Fuc <sub>1</sub> Hex <sub>6</sub> HexNAc <sub>5</sub> | 3054.5     | 8.16  | 3054.7     | 5.55   | 3054.7     | 2.78   |                              |
| Fuc <sub>2</sub> Hex <sub>6</sub> HexNAc <sub>6</sub>                    | 3112.5     | 1.44  | 3112.6     | 0.76   | 3112.6     | 0.31   |                              |
| NeuAc <sub>1</sub> Hex <sub>6</sub> HexNAc <sub>6</sub>                  | 3126.4     | 0.87  | 3125.6     | 0.67   | 3125.7     | 1.34   |                              |
| NeuAc <sub>2</sub> Fuc <sub>2</sub> Hex <sub>5</sub> HexNAc <sub>4</sub> | 3140.5     | 0.80  | 3140.6     | 0.54   | 3140.7     | 0.49   |                              |
| Fuc <sub>1</sub> Hex <sub>7</sub> HexNAc <sub>6</sub>                    | 3142.5     | 2.75  | 3142.6     | 1.18   | 3142.7     | 0.79   |                              |
| Fuc <sub>1</sub> Hex <sub>6</sub> HexNAc <sub>7</sub>                    | 3183.4     | 0.43  | 3183.6     | 0.73   | 3183.6     | 0.23   |                              |
| NeuAc <sub>1</sub> Fuc <sub>3</sub> Hex <sub>5</sub> HexNAc <sub>5</sub> | 3198.4     | 0.64  | 3197.6     | 3.12   | 3197.7     | 0.55   |                              |
| NeuAc <sub>2</sub> Fuc <sub>1</sub> Hex <sub>5</sub> HexNAc <sub>5</sub> | 3212.4     | 5.27  | 3212.6     | 39.75* | 3212.6     | 11.33* | *Sialylated/bisected product |
| Hex <sub>7</sub> HexNAc <sub>7</sub>                                     | 3213.4     | 5.62  | 3213.8     | 25.82  | 3214.0     | 5.10   |                              |
| NeuAc <sub>1</sub> Fuc <sub>2</sub> Hex <sub>6</sub> HexNAc <sub>5</sub> | 3228.4     | 1.67  | 3227.5     | 2.42   | 3227.6     | 1.18   |                              |
| NeuAc <sub>2</sub> Hex <sub>6</sub> HexNAc <sub>5</sub>                  | 3240.4     | 0.83  | 3241.6     | 3.33   | 3241.7     | 1.36   |                              |
| Fuc <sub>3</sub> Hex <sub>6</sub> HexNAc <sub>6</sub>                    | 3286.4     | 1.11  | 3285.5     | 0.88   | 3285.6     | 0.66   |                              |
| NeuAc <sub>1</sub> Fuc <sub>1</sub> Hex <sub>6</sub> HexNAc <sub>6</sub> | 3299.4     | 2.64  | 3299.5     | 1.14   | 3299.6     | 2.69   |                              |
| NeuAc <sub>1</sub> Hex <sub>7</sub> HexNAc <sub>7</sub>                  | 3314.5     | 0.54  | 3314.7     | 0.38   | 3314.7     | 0.33   |                              |
| Fuc <sub>2</sub> Hex <sub>7</sub> HexNAc <sub>6</sub>                    | 3316.4     | 1.90  | 3316.7     | 0.78   | 3316.7     | 0.87   |                              |

| Composition                                                              | MDCK       |      | SIAT1      |        | hCK        |       | Remarks             |
|--------------------------------------------------------------------------|------------|------|------------|--------|------------|-------|---------------------|
|                                                                          | Mass (m/z) | %    | Mass (m/z) | %      | Mass (m/z) | %     |                     |
| NeuAc <sub>3</sub> Fuc <sub>2</sub> Hex <sub>5</sub> HexNAc <sub>4</sub> | 3327.4     | 0.32 | 3327.6     | 0.36   | 3327.7     | 0.22  |                     |
| NeuAc <sub>1</sub> Fuc <sub>1</sub> Hex <sub>7</sub> HexNAc <sub>6</sub> | 3329.3     | 1.00 | 3329.6     | 0.68   | 3329.6     | 1.53  |                     |
| NeuAc <sub>2</sub> Fuc <sub>2</sub> Hex <sub>5</sub> HexNAc <sub>5</sub> | 3385.6     | 0.27 | 3385.7     | 0.34   | 3385.6     | 0.18  |                     |
| Fuc <sub>1</sub> Hex <sub>7</sub> HexNAc <sub>7</sub>                    | 3387.3     | 0.67 | 3387.6     | 0.89   | 3387.5     | 0.27  |                     |
| NeuAc <sub>1</sub> Fuc <sub>3</sub> Hex <sub>6</sub> HexNAc <sub>5</sub> | 3402.4     | 0.77 | 3402.0     | 0.27   | 3401.6     | 0.53  |                     |
| NeuAc <sub>2</sub> Fuc <sub>1</sub> Hex <sub>6</sub> HexNAc <sub>5</sub> | 3416.2     | 1.94 | 3415.5     | 4.82*  | 3415.6     | 2.86* | *Sialylated product |
| NeuAc <sub>1</sub> Fuc <sub>2</sub> Hex <sub>6</sub> HexNAc <sub>6</sub> | 3473.3     | 1.36 | 3472.4     | 1.12   | 3473.5     | 0.49  |                     |
| NeuAc <sub>2</sub> Hex <sub>6</sub> HexNAc <sub>6</sub>                  | 3486.4     | 0.62 | 3486.4     | 1.69   | 3486.4     | 0.27  |                     |
| NeuAc <sub>2</sub> Fuc <sub>4</sub> Hex <sub>5</sub> HexNAc <sub>4</sub> | 3489.3     | 1.73 | 3488.9     | 0.60   | 3487.5     | 0.83  |                     |
| Fuc <sub>3</sub> Hex <sub>7</sub> HexNAc <sub>6</sub>                    | 3490.3     | 3.29 | 3490.4     | 0.48   | 3490.4     | 0.64  |                     |
| NeuAc <sub>1</sub> Fuc <sub>1</sub> Hex <sub>7</sub> HexNAc <sub>6</sub> | 3503.3     | 3.88 | 3503.4     | 1.34   | 3503.5     | 2.67  |                     |
| NeuAc <sub>2</sub> Fuc <sub>2</sub> Hex <sub>5</sub> HexNAc <sub>5</sub> | 3559.8     | 0.12 | 3559.9     | 0.09   | 3560.0     | 0.04  |                     |
| Fuc <sub>2</sub> Hex <sub>7</sub> HexNAc <sub>7</sub>                    | 3561.2     | 0.56 | 3561.8     | 0.14   | 3561.8     | 0.13  |                     |
| NeuAc <sub>1</sub> Hex <sub>7</sub> HexNAc <sub>7</sub>                  | 3574.5     | 0.26 | 3574.3     | 0.43   | 3574.4     | 0.26  |                     |
| NeuAc <sub>2</sub> Fuc <sub>2</sub> Hex <sub>6</sub> HexNAc <sub>5</sub> | 3590.2     | 1.47 | 3589.4     | 2.28   | 3589.4     | 0.80  |                     |
| Fuc <sub>1</sub> Hex <sub>8</sub> HexNAc <sub>7</sub>                    | 3591.8     | 0.38 | 3591.8     | 1.00   | 3591.9     | 0.43  |                     |
| NeuAc <sub>3</sub> Hex <sub>6</sub> HexNAc <sub>5</sub>                  | 3604.2     | 0.71 | 3603.0     | 0.35   | 3602.4     | 0.99  |                     |
| Fuc <sub>1</sub> Hex <sub>7</sub> HexNAc <sub>8</sub>                    | 3633.0     | 0.28 | 3632.3     | 0.57   | 3632.4     | 0.28  |                     |
| NeuAc <sub>1</sub> Fuc <sub>3</sub> Hex <sub>6</sub> HexNAc <sub>6</sub> | 3647.2     | 0.73 | 3646.3     | 2.06   | 3646.4     | 0.34  |                     |
| NeuAc <sub>2</sub> Fuc <sub>1</sub> Hex <sub>6</sub> HexNAc <sub>6</sub> | 3661.0     | 1.93 | 3661.2     | 8.78*  | 3661.3     | 3.51* | *Sialylated product |
| Hex <sub>8</sub> HexNAc <sub>8</sub>                                     | 3662.8     | 0.72 | 3662.7     | 3.44   | 3662.7     | 2.44  |                     |
| NeuAc <sub>1</sub> Fuc <sub>2</sub> Hex <sub>7</sub> HexNAc <sub>6</sub> | 3677.1     | 2.68 | 3676.3     | 0.91   | 3676.4     | 0.57  |                     |
| NeuAc <sub>2</sub> Hex <sub>7</sub> HexNAc <sub>6</sub>                  | 3691.1     | 0.99 | 3690.3     | 1.45   | 3690.4     | 1.30  |                     |
| Fuc <sub>3</sub> Hex <sub>7</sub> HexNAc <sub>7</sub>                    | 3736.1     | 0.55 | 3735.8     | 0.19   | 3736.1     | 0.13  |                     |
| NeuAc <sub>1</sub> Fuc <sub>1</sub> Hex <sub>7</sub> HexNAc <sub>7</sub> | 3748.0     | 0.91 | 3748.2     | 0.57   | 3748.3     | 0.76  |                     |
| NeuAc <sub>2</sub> Fuc <sub>3</sub> Hex <sub>6</sub> HexNAc <sub>5</sub> | 3764.0     | 0.79 | 3763.5     | 0.69   | 3763.3     | 0.30  |                     |
| NeuAc <sub>3</sub> Fuc <sub>1</sub> Hex <sub>6</sub> HexNAc <sub>5</sub> | 3776.9     | 1.55 | 3777.2     | 12.24* | 3777.2     | 2.79* | *Sialylated product |
| Fuc <sub>2</sub> Hex <sub>7</sub> HexNAc <sub>8</sub>                    | 3807.0     | 0.57 | 3806.1     | 0.60   | 3807.3     | 0.33  |                     |
| NeuAc <sub>2</sub> Fuc <sub>2</sub> Hex <sub>6</sub> HexNAc <sub>6</sub> | 3834.0     | 0.66 | 3834.2     | 1.37   | 3834.2     | 0.42  |                     |
| Fuc <sub>1</sub> Hex <sub>8</sub> HexNAc <sub>8</sub>                    | 3837.0     | 1.60 | 3837.1     | 1.97   | 3837.1     | 0.37  |                     |
| NeuAc <sub>3</sub> Hex <sub>6</sub> HexNAc <sub>6</sub>                  | 3848.0     | 0.52 | 3848.1     | 1.81   | 3848.1     | 0.25  |                     |
| NeuAc <sub>1</sub> Fuc <sub>3</sub> Hex <sub>7</sub> HexNAc <sub>6</sub> | 3852.0     | 1.96 | 3851.5     | 1.49   | 3851.3     | 1.55  |                     |
| NeuAc <sub>2</sub> Fuc <sub>1</sub> Hex <sub>7</sub> HexNAc <sub>6</sub> | 3865.1     | 6.38 | 3865.1     | 6.43   | 3865.4     | 6.71  |                     |
| Fuc <sub>4</sub> Hex <sub>7</sub> HexNAc <sub>7</sub>                    | 3910.9     | 0.93 | 3910.1     | 0.58   | 3910.2     | 0.30  |                     |
| NeuAc <sub>2</sub> Hex <sub>7</sub> HexNAc <sub>7</sub>                  | 3937.8     | 0.66 | 3937.1     | 0.33   | 3937.1     | 0.23  |                     |
| NeuAc <sub>2</sub> Fuc <sub>4</sub> Hex <sub>6</sub> HexNAc <sub>5</sub> | 3938.0     | 0.85 | 3938.2     | 0.77   | 3938.4     | 0.31  |                     |

| Composition              | MDCK       |      | SIAT1      |        | hCK        |       | Remarks                      |
|--------------------------|------------|------|------------|--------|------------|-------|------------------------------|
|                          | Mass (m/z) | %    | Mass (m/z) | %      | Mass (m/z) | %     |                              |
| Fuc3 Hex8 HexNAc7        | 3940.0     | 1.64 | 3940.1     | 0.89   | 3940.2     | 0.50  |                              |
| NeuAc3 Fuc2 Hex6 HexNAc5 | 3951.9     | 1.42 | 3951.0     | 0.52   | 3951.1     | 0.13  |                              |
| NeuAc1 Fuc1 Hex8 HexNAc7 | 3953.1     | 2.06 | 3953.3     | 0.88   | 3953.2     | 1.51  |                              |
| NeuAc2 Fuc3 Hex6 HexNAc6 | 4007.8     | 0.40 | 4009.0     | 2.36   | 4009.1     | 0.33  |                              |
| Fuc2 Hex8 HexNAc8        | 4011.1     | 0.37 | 4011.4     | 0.47   | 4011.3     | 0.21  |                              |
| NeuAc3 Fuc1 Hex6 HexNAc6 | 4022.1     | 0.70 | 4022.0     | 18.94* | 4022.2     | 1.82* | *Sialylated bisected product |
| NeuAc1 Hex8 HexNAc8      | 4024.3     | 0.37 | 4024.3     | 8.35   | 4024.3     | 1.20  |                              |
| NeuAc1 Fuc4 Hex7 HexNAc6 | 4026.1     | 0.53 | 4026.0     | 5.34   | 4026.0     | 0.70  |                              |
| NeuAc2 Fuc2 Hex7 HexNAc6 | 4039.3     | 0.28 | 4039.1     | 1.64   | 4039.1     | 1.31  |                              |
| NeuAc3 Hex7 HexNAc6      | 4052.7     | 0.59 | 4051.9     | 2.11   | 4051.1     | 1.52  |                              |
| NeuAc3 Fuc3 Hex6 HexNAc5 | 4125.7     | 1.13 | 4124.8     | 0.31   | 4124.9     | 0.20  |                              |
| NeuAc1 Fuc2 Hex8 HexNAc7 | 4127.0     | 0.99 | 4127.1     | 0.41   | 4127.0     | 0.43  |                              |
| NeuAc4 Fuc1 Hex6 HexNAc5 | 4138.5     | 0.25 | 4138.8     | 0.39   | 4138.9     | 0.27  |                              |
| NeuAc2 Hex8 HexNAc7      | 4141.6     | 0.72 | 4140.2     | 0.30   | 4140.3     | 0.17  |                              |
| NeuAc2 Fuc4 Hex6 HexNAc6 | 4183.4     | 0.23 | 4183.6     | 0.14   | 4183.6     | 0.05  |                              |
| Fuc3 Hex8 HexNAc8        | 4184.6     | 0.33 | 4185.2     | 0.11   | 4184.9     | 0.17  |                              |
| NeuAc1 Fuc1 Hex8 HexNAc8 | 4197.6     | 0.34 | 4197.9     | 0.55   | 4197.6     | 0.05  |                              |
| NeuAc2 Fuc3 Hex7 HexNAc6 | 4211.6     | 0.47 | 4211.9     | 0.64   | 4210.8     | 0.22  |                              |
| NeuAc3 Fuc1 Hex7 HexNAc6 | 4225.8     | 2.27 | 4225.9     | 2.67   | 4225.9     | 3.97* | *Sialylated product          |
| NeuAc2 Fuc2 Hex7 HexNAc7 | 4284.3     | 0.55 | 4284.6     | 0.52   | 4284.6     | 0.16  |                              |
| Fuc1 Hex9 HexNAc9        | 4286.4     | 0.80 | 4286.1     | 0.19   | 4286.1     | 0.12  |                              |
| NeuAc3 Hex7 HexNAc7      | 4298.4     | 0.58 | 4297.6     | 0.42   | 4297.7     | 0.17  |                              |
| NeuAc3 Fuc4 Hex6 HexNAc5 | 4299.2     | 0.28 | 4299.2     | 0.18   | 4299.2     | 0.08  |                              |
| NeuAc1 Fuc3 Hex8 HexNAc7 | 4301.5     | 1.44 | 4301.2     | 0.19   | 4301.2     | 0.11  |                              |
| NeuAc2 Fuc1 Hex8 HexNAc7 | 4314.2     | 1.41 | 4314.4     | 1.41   | 4313.8     | 1.77  |                              |
| NeuAc2 Hex8 HexNAc8      | 4385.3     | 0.22 | 4385.2     | 0.07   | 4385.2     | 0.04  |                              |
| NeuAc2 Fuc4 Hex7 HexNAc6 | 4387.6     | 0.28 | 4387.2     | 0.08   | 4387.2     | 0.04  |                              |
| Fuc3 Hex9 HexNAc8        | 4389.2     | 0.31 | 4389.2     | 0.06   | 4389.2     | 0.04  |                              |
| NeuAc3 Fuc2 Hex7 HexNAc6 | 4399.3     | 0.51 | 4399.7     | 0.30   | 4399.8     | 0.21  |                              |
| NeuAc1 Fuc1 Hex9 HexNAc8 | 4402.5     | 0.93 | 4402.4     | 0.50   | 4402.4     | 0.17  |                              |
| NeuAc4 Hex7 HexNAc6      | 4413.2     | 0.87 | 4412.4     | 0.28   | 4412.4     | 0.31  |                              |
| NeuAc3 Fuc1 Hex7 HexNAc7 | 4471.4     | 1.30 | 4471.2     | 1.29   | 4471.2     | 0.11  |                              |
| NeuAc1 Hex9 HexNAc9      | 4473.5     | 0.69 | 4473.5     | 1.60   | 4473.5     | 0.40  |                              |
| NeuAc1 Fuc4 Hex8 HexNAc7 | 4475.4     | 0.44 | 4475.6     | 0.38   | 4475.6     | 0.14  |                              |
| NeuAc2 Fuc2 Hex8 HexNAc7 | 4486.2     | 0.60 | 4487.6     | 0.39   | 4487.5     | 0.37  |                              |
| NeuAc3 Hex8 HexNAc7      | 4501.1     | 0.32 | 4500.3     | 0.28   | 4500.3     | 0.25  |                              |

| Composition                                                               | MDCK       |      | SIAT1      |       | hCK        |      | Remarks             |
|---------------------------------------------------------------------------|------------|------|------------|-------|------------|------|---------------------|
|                                                                           | Mass (m/z) | %    | Mass (m/z) | %     | Mass (m/z) | %    |                     |
| NeuAc <sub>3</sub> Fuc <sub>3</sub> Hex <sub>7</sub> HexNAc <sub>6</sub>  | 4573.0     | 0.31 | 4574.2     | 0.33  | 4574.2     | 0.09 |                     |
| NeuAc <sub>1</sub> Fuc <sub>2</sub> Hex <sub>9</sub> HexNAc <sub>8</sub>  | 4576.6     | 0.23 | 4576.3     | 0.26  | 4576.3     | 0.13 |                     |
| NeuAc <sub>4</sub> Fuc <sub>1</sub> Hex <sub>7</sub> HexNAc <sub>6</sub>  | 4587.3     | 3.04 | 4587.4     | 1.98  | 4587.4     | 1.64 |                     |
| NeuAc <sub>2</sub> Fuc <sub>4</sub> Hex <sub>7</sub> HexNAc <sub>7</sub>  | 4632.3     | 0.11 | 4632.4     | 0.09  | 4632.4     | 0.05 |                     |
| Fuc <sub>3</sub> Hex <sub>9</sub> HexNAc <sub>9</sub>                     | 4634.4     | 0.10 | 4634.2     | 0.14  | 4634.2     | 0.05 |                     |
| NeuAc <sub>3</sub> Fuc <sub>2</sub> Hex <sub>7</sub> HexNAc <sub>7</sub>  | 4645.7     | 0.16 | 4645.8     | 0.06  | 4645.8     | 0.02 |                     |
| NeuAc <sub>1</sub> Fuc <sub>1</sub> Hex <sub>9</sub> HexNAc <sub>9</sub>  | 4647.7     | 0.13 | 4647.2     | 0.22  | 4647.2     | 0.06 |                     |
| NeuAc <sub>1</sub> Fuc <sub>5</sub> Hex <sub>8</sub> HexNAc <sub>7</sub>  | 4649.5     | 0.08 | 4649.2     | 0.12  | 4649.2     | 0.04 |                     |
| NeuAc <sub>2</sub> Fuc <sub>3</sub> Hex <sub>8</sub> HexNAc <sub>7</sub>  | 4662.5     | 0.13 | 4662.3     | 0.34  | 4662.3     | 0.04 |                     |
| NeuAc <sub>3</sub> Fuc <sub>1</sub> Hex <sub>8</sub> HexNAc <sub>7</sub>  | 4675.1     | 1.74 | 4675.1     | 3.68* | 4675.1     | 2.00 | *Sialylated product |
| NeuAc <sub>1</sub> Fuc <sub>4</sub> Hex <sub>8</sub> HexNAc <sub>8</sub>  | 4719.8     | 0.27 | 4719.9     | 0.16  | 4720.1     | 0.06 |                     |
| NeuAc <sub>2</sub> Fuc <sub>2</sub> Hex <sub>8</sub> HexNAc <sub>8</sub>  | 4733.6     | 0.17 | 4733.4     | 0.06  | 4733.4     | 0.03 |                     |
| Fuc <sub>1</sub> Hex <sub>10</sub> HexNAc <sub>10</sub>                   | 4735.5     | 0.09 | 4735.4     | 0.07  | 4735.4     | 0.03 |                     |
| NeuAc <sub>3</sub> Hex <sub>8</sub> HexNAc <sub>8</sub>                   | 4746.7     | 0.17 | 4746.4     | 0.08  | 4746.4     | 0.03 |                     |
| NeuAc <sub>3</sub> Fuc <sub>4</sub> Hex <sub>7</sub> HexNAc <sub>6</sub>  | 4748.5     | 0.15 | 4748.4     | 0.10  | 4748.4     | 0.04 |                     |
| NeuAc <sub>1</sub> Fuc <sub>3</sub> Hex <sub>9</sub> HexNAc <sub>8</sub>  | 4750.5     | 0.17 | 4750.4     | 0.10  | 4750.4     | 0.04 |                     |
| NeuAc <sub>4</sub> Fuc <sub>2</sub> Hex <sub>7</sub> HexNAc <sub>6</sub>  | 4760.7     | 0.31 | 4760.9     | 0.23  | 4761.0     | 0.11 |                     |
| NeuAc <sub>2</sub> Fuc <sub>1</sub> Hex <sub>9</sub> HexNAc <sub>8</sub>  | 4763.5     | 0.39 | 4763.5     | 0.12  | 4763.5     | 0.08 |                     |
| NeuAc <sub>2</sub> Fuc <sub>5</sub> Hex <sub>7</sub> HexNAc <sub>7</sub>  | 4806.6     | 0.10 | 4806.4     | 0.04  | 4806.4     | 0.02 |                     |
| Fuc <sub>4</sub> Hex <sub>9</sub> HexNAc <sub>9</sub>                     | 4808.6     | 0.30 | 4808.4     | 0.04  | 4808.4     | 0.02 |                     |
| NeuAc <sub>3</sub> Fuc <sub>3</sub> Hex <sub>7</sub> HexNAc <sub>7</sub>  | 4819.5     | 0.10 | 4819.4     | 0.04  | 4819.4     | 0.01 |                     |
| NeuAc <sub>1</sub> Fuc <sub>2</sub> Hex <sub>9</sub> HexNAc <sub>9</sub>  | 4821.5     | 0.14 | 4821.4     | 0.05  | 4821.4     | 0.02 |                     |
| NeuAc <sub>1</sub> Fuc <sub>6</sub> Hex <sub>8</sub> HexNAc <sub>7</sub>  | 4823.7     | 0.11 | 4823.4     | 0.04  | 4823.4     | 0.02 |                     |
| NeuAc <sub>2</sub> Hex <sub>9</sub> HexNAc <sub>9</sub>                   | 4834.5     | 0.35 | 4834.6     | 0.24  | 4834.6     | 0.03 |                     |
| NeuAc <sub>2</sub> Fuc <sub>4</sub> Hex <sub>8</sub> HexNAc <sub>7</sub>  | 4836.6     | 0.21 | 4836.4     | 0.07  | 4836.4     | 0.03 |                     |
| NeuAc <sub>3</sub> Fuc <sub>2</sub> Hex <sub>8</sub> HexNAc <sub>7</sub>  | 4849.1     | 0.11 | 4849.4     | 0.06  | 4849.4     | 0.03 |                     |
| NeuAc <sub>1</sub> Fuc <sub>1</sub> Hex <sub>10</sub> HexNAc <sub>9</sub> | 4851.6     | 0.34 | 4851.4     | 0.07  | 4851.4     | 0.03 |                     |
| NeuAc <sub>4</sub> Hex <sub>8</sub> HexNAc <sub>7</sub>                   | 4862.6     | 0.21 | 4861.8     | 0.25  | 4861.8     | 0.10 |                     |
| NeuAc <sub>1</sub> Fuc <sub>5</sub> Hex <sub>8</sub> HexNAc <sub>8</sub>  | 4894.6     | 0.10 | 4894.5     | 0.06  | 4894.5     | 0.02 |                     |
| NeuAc <sub>2</sub> Fuc <sub>3</sub> Hex <sub>8</sub> HexNAc <sub>8</sub>  | 4907.6     | 0.14 | 4907.5     | 0.12  | 4907.5     | 0.02 |                     |
| Fuc <sub>2</sub> Hex <sub>10</sub> HexNAc <sub>10</sub>                   | 4909.5     | 0.13 | 4909.5     | 0.07  | 4909.5     | 0.02 |                     |
| NeuAc <sub>3</sub> Fuc <sub>1</sub> Hex <sub>8</sub> HexNAc <sub>8</sub>  | 4920.7     | 0.20 | 4920.5     | 0.50  | 4920.5     | 0.05 |                     |
| NeuAc <sub>1</sub> Hex <sub>10</sub> HexNAc <sub>10</sub>                 | 4922.5     | 0.29 | 4922.5     | 0.28  | 4922.5     | 0.04 |                     |
| NeuAc <sub>1</sub> Fuc <sub>4</sub> Hex <sub>9</sub> HexNAc <sub>8</sub>  | 4924.5     | 0.18 | 4924.6     | 0.13  | 4924.6     | 0.04 |                     |
| NeuAc <sub>2</sub> Fuc <sub>2</sub> Hex <sub>9</sub> HexNAc <sub>8</sub>  | 4937.7     | 0.35 | 4937.5     | 0.24  | 4937.6     | 0.12 |                     |
| NeuAc <sub>5</sub> Fuc <sub>1</sub> Hex <sub>7</sub> HexNAc <sub>6</sub>  | 4948.4     | 0.12 | 4947.5     | 0.09  | 4947.5     | 0.03 |                     |

| Composition                                                                | MDCK       |      | SIAT1      |       | hCK        |        | Remarks             |
|----------------------------------------------------------------------------|------------|------|------------|-------|------------|--------|---------------------|
|                                                                            | Mass (m/z) | %    | Mass (m/z) | %     | Mass (m/z) | %      |                     |
| NeuAc <sub>3</sub> Hex <sub>9</sub> HexNAc <sub>8</sub>                    | 4950.6     | 0.14 | 4950.5     | 0.24  | 4950.5     | 0.12   |                     |
| NeuAc <sub>2</sub> Fuc <sub>6</sub> Hex <sub>7</sub> HexNAc <sub>7</sub>   | 4980.5     | 0.07 | 4980.5     | 0.09  | 4980.5     | 0.02   |                     |
| NeuAc <sub>3</sub> Fuc <sub>4</sub> Hex <sub>7</sub> HexNAc <sub>7</sub>   | 4993.5     | 0.06 | 4993.4     | 0.08  | 4993.5     | 0.02   |                     |
| NeuAc <sub>1</sub> Fuc <sub>3</sub> Hex <sub>9</sub> HexNAc <sub>9</sub>   | 4995.3     | 0.15 | 4995.5     | 0.08  | 4995.5     | 0.03   |                     |
| NeuAc <sub>2</sub> Fuc <sub>1</sub> Hex <sub>9</sub> HexNAc <sub>9</sub>   | 5008.8     | 0.05 | 5008.5     | 0.13  | 5008.7     | 0.04   |                     |
| NeuAc <sub>2</sub> Fuc <sub>5</sub> Hex <sub>8</sub> HexNAc <sub>7</sub>   | 5010.6     | 0.06 | 5010.5     | 0.07  | 5010.5     | 0.03   |                     |
| NeuAc <sub>3</sub> Fuc <sub>3</sub> Hex <sub>8</sub> HexNAc <sub>7</sub>   | 5023.5     | 0.10 | 5023.7     | 0.06  | 5023.6     | 0.03   |                     |
| NeuAc <sub>1</sub> Fuc <sub>2</sub> Hex <sub>10</sub> HexNAc <sub>9</sub>  | 5025.6     | 0.10 | 5025.6     | 0.08  | 5025.6     | 0.03   |                     |
| NeuAc <sub>4</sub> Fuc <sub>1</sub> Hex <sub>8</sub> HexNAc <sub>7</sub>   | 5036.7     | 0.17 | 5036.3     | 0.86* | 5036.3     | 0.08   | *Sialylated product |
| NeuAc <sub>1</sub> Fuc <sub>6</sub> Hex <sub>8</sub> HexNAc <sub>8</sub>   | 5068.6     | 0.04 | 5068.4     | 0.11  | 5068.4     | 0.03   |                     |
| NeuAc <sub>2</sub> Fuc <sub>4</sub> Hex <sub>8</sub> HexNAc <sub>8</sub>   | 5081.6     | 0.04 | 5081.6     | 0.05  | 5081.6     | 0.02   |                     |
| Fuc <sub>3</sub> Hex <sub>10</sub> HexNAc <sub>10</sub>                    | 5083.5     | 0.05 | 5083.6     | 0.05  | 5083.6     | 0.02   |                     |
| NeuAc <sub>3</sub> Fuc <sub>2</sub> Hex <sub>8</sub> HexNAc <sub>8</sub>   | 5094.8     | 0.05 | 5094.6     | 0.06  | 5094.6     | 0.02   |                     |
| NeuAc <sub>1</sub> Fuc <sub>1</sub> Hex <sub>10</sub> HexNAc <sub>10</sub> | 5096.8     | 0.05 | 5096.5     | 0.07  | 5096.6     | 0.02   |                     |
| NeuAc <sub>1</sub> Fuc <sub>5</sub> Hex <sub>9</sub> HexNAc <sub>8</sub>   | 5098.6     | 0.04 | 5098.7     | 0.03  | 5098.6     | 0.01   |                     |
| NeuAc <sub>2</sub> Fuc <sub>3</sub> Hex <sub>9</sub> HexNAc <sub>8</sub>   | 5111.3     | 0.14 | 5111.4     | 0.18  | 5111.4     | 0.05   |                     |
| NeuAc <sub>3</sub> Fuc <sub>1</sub> Hex <sub>9</sub> HexNAc <sub>8</sub>   | 5124.8     | 0.34 | 5125.2     | 1.22* | 5125.2     | 0.46   | *Sialylated product |
| NeuAc <sub>1</sub> Fuc <sub>4</sub> Hex <sub>9</sub> HexNAc <sub>9</sub>   | 5169.7     | 0.17 | 5169.8     | 0.03  | 5169.8     | 0.02   |                     |
| NeuAc <sub>2</sub> Fuc <sub>2</sub> Hex <sub>9</sub> HexNAc <sub>9</sub>   | 5182.9     | 0.09 | 5182.6     | 0.03  | 5182.6     | 0.01   |                     |
| NeuAc <sub>2</sub> Fuc <sub>6</sub> Hex <sub>8</sub> HexNAc <sub>7</sub>   | 5184.8     | 0.06 | 5184.7     | 0.02  | 5184.7     | 0.01   |                     |
| NeuAc <sub>3</sub> Hex <sub>9</sub> HexNAc <sub>9</sub>                    | 5195.8     | 0.08 | 5195.5     | 0.03  | 5195.5     | 0.02   |                     |
| NeuAc <sub>3</sub> Fuc <sub>4</sub> Hex <sub>8</sub> HexNAc <sub>7</sub>   | 5197.7     | 0.09 | 5197.9     | 0.05  | 5197.8     | 0.01   |                     |
| NeuAc <sub>1</sub> Fuc <sub>3</sub> Hex <sub>10</sub> HexNAc <sub>9</sub>  | 5199.7     | 0.08 | 5199.7     | 0.03  | 5199.6     | 0.02   |                     |
| NeuAc <sub>4</sub> Fuc <sub>2</sub> Hex <sub>8</sub> HexNAc <sub>7</sub>   | 5210.9     | 0.21 | 5210.7     | 0.04  | 5210.7     | 0.02   |                     |
| NeuAc <sub>2</sub> Fuc <sub>1</sub> Hex <sub>10</sub> HexNAc <sub>9</sub>  | 5212.7     | 0.16 | 5212.6     | 0.04  | 5212.6     | 0.03   |                     |
| NeuAc <sub>2</sub> Fuc <sub>5</sub> Hex <sub>8</sub> HexNAc <sub>8</sub>   | 5255.6     | 0.06 | 5255.6     | 0.02  | 5255.6     | 0.01   |                     |
| NeuAc <sub>3</sub> Fuc <sub>3</sub> Hex <sub>8</sub> HexNAc <sub>8</sub>   | 5268.7     | 0.05 | 5268.7     | 0.03  | 5268.7     | 0.01   |                     |
| NeuAc <sub>1</sub> Fuc <sub>2</sub> Hex <sub>10</sub> HexNAc <sub>10</sub> | 5270.5     | 0.04 | 5270.7     | 0.03  | 5270.7     | 0.02   |                     |
| NeuAc <sub>1</sub> Fuc <sub>6</sub> Hex <sub>9</sub> HexNAc <sub>8</sub>   | 5272.8     | 0.04 | 5272.8     | 0.02  | 5272.8     | < 0.01 |                     |
| NeuAc <sub>2</sub> Hex <sub>10</sub> HexNAc <sub>10</sub>                  | 5283.7     | 0.08 | 5283.8     | 0.08  | 5283.8     | 0.02   |                     |
| NeuAc <sub>2</sub> Fuc <sub>4</sub> Hex <sub>9</sub> HexNAc <sub>8</sub>   | 5285.8     | 0.06 | 5285.8     | 0.04  | 5285.8     | 0.01   |                     |
| NeuAc <sub>3</sub> Fuc <sub>2</sub> Hex <sub>9</sub> HexNAc <sub>8</sub>   | 5298.8     | 0.17 | 5298.8     | 0.19  | 5298.8     | 0.06   |                     |
| NeuAc <sub>1</sub> Fuc <sub>1</sub> Hex <sub>11</sub> HexNAc <sub>10</sub> | 5300.8     | 0.08 | 5300.8     | 0.07  | 5300.8     | 0.02   |                     |
| NeuAc <sub>4</sub> Hex <sub>9</sub> HexNAc <sub>8</sub>                    | 5311.8     | 0.07 | 5311.8     | 0.24  | 5311.8     | 0.06   |                     |
| NeuAc <sub>1</sub> Fuc <sub>5</sub> Hex <sub>9</sub> HexNAc <sub>9</sub>   | 5343.8     | 0.04 | 5343.8     | 0.04  | 5343.8     | 0.02   |                     |
| NeuAc <sub>2</sub> Fuc <sub>3</sub> Hex <sub>9</sub> HexNAc <sub>9</sub>   | 5356.8     | 0.04 | 5356.8     | 0.05  | 5356.8     | 0.02   |                     |

| Composition                | MDCK       |      | SIAT1      |      | hCK        |        | Remarks |
|----------------------------|------------|------|------------|------|------------|--------|---------|
|                            | Mass (m/z) | %    | Mass (m/z) | %    | Mass (m/z) | %      |         |
| Fuc2 Hex11 HexNAc11        | 5358.8     | 0.03 | 5358.6     | 0.03 | 5358.6     | 0.01   |         |
| NeuAc3 Fuc1 Hex9 HexNAc9   | 5369.8     | 0.04 | 5369.8     | 0.12 | 5369.8     | 0.03   |         |
| NeuAc1 Hex11 HexNAc11      | 5371.8     | 0.04 | 5371.8     | 0.06 | 5371.8     | 0.02   |         |
| NeuAc1 Fuc4 Hex10 HexNAc9  | 5373.8     | 0.03 | 5373.8     | 0.03 | 5373.8     | 0.02   |         |
| NeuAc4 Fuc3 Hex8 HexNAc7   | 5384.8     | 0.09 | 5384.8     | 0.07 | 5384.8     | 0.03   |         |
| NeuAc2 Fuc2 Hex10 HexNAc9  | 5386.8     | 0.07 | 5386.8     | 0.04 | 5386.8     | 0.03   |         |
| NeuAc5 Fuc1 Hex8 HexNAc7   | 5397.8     | 0.04 | 5397.8     | 0.07 | 5397.8     | 0.04   |         |
| NeuAc3 Hex10 HexNAc9       | 5399.8     | 0.04 | 5399.8     | 0.07 | 5399.8     | 0.04   |         |
| NeuAc2 Fuc6 Hex8 HexNAc8   | 5429.8     | 0.03 | 5429.8     | 0.04 | 5429.8     | 0.02   |         |
| NeuAc3 Fuc4 Hex8 HexNAc8   | 5442.8     | 0.03 | 5442.8     | 0.03 | 5442.8     | 0.01   |         |
| NeuAc1 Fuc3 Hex10 HexNAc10 | 5444.8     | 0.03 | 5444.8     | 0.03 | 5444.8     | 0.01   |         |
| NeuAc1 Fuc7 Hex9 HexNAc8   | 5446.8     | 0.02 | 5446.8     | 0.02 | 5446.8     | < 0.01 |         |
| NeuAc2 Fuc1 Hex10 HexNAc10 | 5457.8     | 0.02 | 5457.8     | 0.03 | 5457.8     | 0.01   |         |
| NeuAc2 Fuc5 Hex9 HexNAc8   | 5459.8     | 0.02 | 5459.8     | 0.02 | 5459.8     | 0.01   |         |
| NeuAc3 Fuc3 Hex9 HexNAc8   | 5472.8     | 0.03 | 5472.8     | 0.05 | 5472.8     | 0.02   |         |
| NeuAc1 Fuc2 Hex11 HexNAc10 | 5474.8     | 0.03 | 5474.8     | 0.03 | 5474.8     | 0.01   |         |
| NeuAc4 Fuc1 Hex9 HexNAc8   | 5487.1     | 0.06 | 5487.4     | 0.34 | 5487.4     | 0.05   |         |
| NeuAc2 Fuc4 Hex9 HexNAc9   | 5530.9     | 0.02 | 5530.7     | 0.03 | 5530.6     | 0.02   |         |
| Fuc3 Hex11 HexNAc11        | 5532.9     | 0.02 | 5532.8     | 0.01 | 5532.8     | 0.01   |         |
| NeuAc1 Fuc1 Hex11 HexNAc11 | 5545.9     | 0.02 | 5545.9     | 0.02 | 5545.8     | < 0.01 |         |
| NeuAc1 Fuc5 Hex10 HexNAc9  | 5547.9     | 0.02 | 5547.9     | 0.01 | 5547.9     | < 0.01 |         |
| NeuAc4 Fuc4 Hex8 HexNAc7   | 5558.9     | 0.05 | 5558.9     | 0.03 | 5558.8     | 0.01   |         |
| NeuAc2 Fuc3 Hex10 HexNAc9  | 5560.9     | 0.04 | 5560.9     | 0.03 | 5560.9     | 0.01   |         |
| NeuAc3 Fuc1 Hex10 HexNAc9  | 5574.4     | 0.02 | 5574.4     | 0.06 | 5574.4     | 0.08   |         |
| NeuAc1 Fuc4 Hex10 HexNAc10 | 5618.9     | 0.09 | 5618.9     | 0.01 | 5618.8     | < 0.01 |         |
| NeuAc2 Fuc2 Hex10 HexNAc10 | 5631.9     | 0.03 | 5631.9     | 0.01 | 5631.8     | < 0.01 |         |
| NeuAc2 Fuc6 Hex9 HexNAc8   | 5633.9     | 0.02 | 5633.9     | 0.01 | 5633.9     | < 0.01 |         |
| NeuAc3 Fuc4 Hex9 HexNAc8   | 5646.9     | 0.04 | 5646.9     | 0.02 | 5646.9     | 0.01   |         |
| NeuAc1 Fuc3 Hex11 HexNAc10 | 5648.9     | 0.03 | 5648.9     | 0.02 | 5648.9     | < 0.01 |         |
| NeuAc4 Fuc2 Hex9 HexNAc8   | 5659.9     | 0.06 | 5659.9     | 0.04 | 5659.9     | 0.02   |         |
| NeuAc2 Fuc1 Hex11 HexNAc10 | 5661.9     | 0.04 | 5661.8     | 0.02 | 5661.8     | 0.01   |         |
| NeuAc5 Hex9 HexNAc8        | 5673.1     | 0.01 | 5673.2     | 0.02 | 5673.2     | < 0.01 |         |
| NeuAc1 Fuc2 Hex11 HexNAc11 | 5720.2     | 0.02 | 5720.1     | 0.02 | 5720.1     | 0.01   |         |
| NeuAc1 Fuc6 Hex10 HexNAc9  | 5722.1     | 0.01 | 5722.0     | 0.02 | 5722.0     | 0.01   |         |
| NeuAc2 Hex11 HexNAc11      | 5733.1     | 0.02 | 5733.0     | 0.03 | 5733.0     | 0.01   |         |
| NeuAc2 Fuc4 Hex10 HexNAc9  | 5735.1     | 0.02 | 5735.2     | 0.01 | 5735.2     | 0.01   |         |

| Composition                                                                | MDCK       |      | SIAT1      |        | hCK        |        | Remarks |
|----------------------------------------------------------------------------|------------|------|------------|--------|------------|--------|---------|
|                                                                            | Mass (m/z) | %    | Mass (m/z) | %      | Mass (m/z) | %      |         |
| NeuAc <sub>3</sub> Fuc <sub>2</sub> Hex <sub>10</sub> HexNAc <sub>9</sub>  | 5748.1     | 0.03 | 5748.0     | 0.04   | 5748.0     | 0.02   |         |
| NeuAc <sub>1</sub> Fuc <sub>1</sub> Hex <sub>12</sub> HexNAc <sub>11</sub> | 5750.1     | 0.02 | 5750.2     | 0.01   | 5750.2     | 0.01   |         |
| NeuAc <sub>4</sub> Hex <sub>10</sub> HexNAc <sub>9</sub>                   | 5761.2     | 0.02 | 5761.0     | 0.03   | 5761.0     | 0.02   |         |
| NeuAc <sub>3</sub> Fuc <sub>1</sub> Hex <sub>10</sub> HexNAc <sub>10</sub> | 5819.1     | 0.02 | 5819.0     | 0.02   | 5819.0     | < 0.01 |         |
| NeuAc <sub>1</sub> Hex <sub>12</sub> HexNAc <sub>12</sub>                  | 5821.1     | 0.02 | 5821.0     | 0.02   | 5821.0     | < 0.01 |         |
| NeuAc <sub>1</sub> Fuc <sub>4</sub> Hex <sub>11</sub> HexNAc <sub>10</sub> | 5823.1     | 0.01 | 5823.0     | 0.01   | 5823.0     | < 0.01 |         |
| NeuAc <sub>4</sub> Fuc <sub>3</sub> Hex <sub>9</sub> HexNAc <sub>8</sub>   | 5834.0     | 0.02 | 5834.0     | 0.02   | 5834.0     | 0.01   |         |
| NeuAc <sub>2</sub> Fuc <sub>2</sub> Hex <sub>11</sub> HexNAc <sub>10</sub> | 5836.0     | 0.02 | 5836.0     | 0.02   | 5836.0     | 0.01   |         |
| Fuc <sub>1</sub> Hex <sub>13</sub> HexNAc <sub>12</sub>                    | 5838.0     | 0.01 | 5838.3     | 0.01   | 5838.0     | < 0.01 |         |
| NeuAc <sub>5</sub> Fuc <sub>1</sub> Hex <sub>9</sub> HexNAc <sub>8</sub>   | 5847.2     | 0.03 | 5847.0     | 0.02   | 5847.0     | < 0.01 |         |
| NeuAc <sub>1</sub> Fuc <sub>3</sub> Hex <sub>11</sub> HexNAc <sub>11</sub> | 5894.1     | 0.02 | 5894.0     | 0.01   | 5894.0     | < 0.01 |         |
| NeuAc <sub>2</sub> Fuc <sub>1</sub> Hex <sub>11</sub> HexNAc <sub>11</sub> | 5907.1     | 0.02 | 5907.0     | 0.01   | 5907.0     | < 0.01 |         |
| NeuAc <sub>2</sub> Fuc <sub>5</sub> Hex <sub>10</sub> HexNAc <sub>9</sub>  | 5909.1     | 0.02 | 5909.1     | 0.01   | 5909.1     | < 0.01 |         |
| NeuAc <sub>3</sub> Fuc <sub>3</sub> Hex <sub>10</sub> HexNAc <sub>9</sub>  | 5922.1     | 0.02 | 5922.1     | 0.02   | 5922.1     | 0.01   |         |
| NeuAc <sub>1</sub> Fuc <sub>2</sub> Hex <sub>12</sub> HexNAc <sub>11</sub> | 5924.1     | 0.02 | 5924.1     | 0.01   | 5924.1     | < 0.01 |         |
| NeuAc <sub>4</sub> Fuc <sub>1</sub> Hex <sub>10</sub> HexNAc <sub>9</sub>  | 5935.1     | 0.03 | 5935.4     | 0.10   | 5935.4     | 0.04   |         |
| NeuAc <sub>1</sub> Fuc <sub>6</sub> Hex <sub>10</sub> HexNAc <sub>10</sub> | 5967.1     | 0.02 | 5967.1     | 0.02   | 5967.1     | < 0.01 |         |
| NeuAc <sub>1</sub> Fuc <sub>1</sub> Hex <sub>12</sub> HexNAc <sub>12</sub> | 5995.2     | 0.01 | 5995.2     | 0.01   | 5995.2     | < 0.01 |         |
| NeuAc <sub>1</sub> Fuc <sub>5</sub> Hex <sub>11</sub> HexNAc <sub>10</sub> | 5997.2     | 0.01 | 5997.2     | < 0.01 | 5997.2     | < 0.01 |         |
