# Supplementary material for: Sialylated and sulfated N-Glycans in MDCK and engineered MDCK cells for influenza virus studies
Source: PubMed Central journal article supplement (PMC9325728; doi:10.1038/s41598-022-16605-5), 2022-07-26
Supplement: 41598_2022_16605_MOESM2_ESM.pdf [file 41598_2022_16605_MOESM2_ESM.pdf]

## Supplementary Table 2

## Percentage values of structural features (%)

## Sialylation (%)

|                | MDCK  | SIAT1 | hCK   |
|----------------|-------|-------|-------|
| non-sialylated | 73.87 | 60.17 | 70.40 |
| sialylated     | 26.13 | 39.83 | 29.60 |
| 1-sia          | 16.35 | 15.23 | 16.71 |
| 2-sia          | 6.17  | 16.33 | 9.95  |
| 3-sia          | 2.75  | 7.52  | 2.51  |
| 4-sia          | 0.83  | 0.72  | 0.41  |
| 5-sia          | 0.03  | 0.03  | 0.01  |

## Fucosylation (%)

|                 | MDCK   | SIAT1  | hCK    |
|-----------------|--------|--------|--------|
| non-fucosylated | 66.59  | 62.99  | 67.51  |
| fucosylated     | 33.41  | 37.01  | 32.49  |
| 1-fuc           | 21.03  | 27.55  | 27.65  |
| 2-fuc           | 7.38   | 4.24   | 2.66   |
| 3-fuc           | 3.75   | 3.77   | 1.69   |
| 4-fuc           | 1.10   | 1.33   | 0.43   |
| 5-fuc           | 0.08   | 0.06   | 0.03   |
| 6-fuc           | 0.06   | 0.05   | 0.02   |
| 7-fuc           | < 0.01 | < 0.01 | < 0.01 |

## Bisection (%)

|                 | MDCK  | SIAT1 | hCK   |
|-----------------|-------|-------|-------|
| non-bisected    | 95.68 | 90.88 | 94.75 |
| bisected        | 4.32  | 9.12  | 5.24  |
| sia/fuc         | 1.54  | 6.67  | 2.37  |
| sia/non-fuc     | 0.13  | 0.97  | 0.31  |
| non-sia/fuc     | 2.65  | 1.48  | 2.57  |
| non-sia/non-fuc | 0     | 0     | 0     |
