# Supplementary material for: Sialylated and sulfated N-Glycans in MDCK and engineered MDCK cells for influenza virus studies
Source: PubMed Central journal article supplement (PMC9325728; doi:10.1038/s41598-022-16605-5), 2022-07-26
Supplement: 41598_2022_16605_MOESM3_ESM.pdf [file 41598_2022_16605_MOESM3_ESM.pdf]

### Supplementary Table 3

List of representative peaks of N-glycans by MALDI-TOF-MS analysis in MDCK cell line

| Composition                                                                                                                         | Mass (m/z) | Non %  | MDCK   |        | Remarks                               |
|-------------------------------------------------------------------------------------------------------------------------------------|------------|--------|--------|--------|---------------------------------------|
|                                                                                                                                     |            |        | NeuA % | NeuS % |                                       |
| Hex <sub>5</sub> HexNAc <sub>2</sub>                                                                                                | 1580       | 50.03  | 31.46  | 34.12  |                                       |
| Hex <sub>6</sub> HexNAc <sub>2</sub>                                                                                                | 1784       | 57.73  | 44.64  | 41.02  |                                       |
| Fuc <sub>1</sub> Hex <sub>3</sub> HexNAc <sub>4</sub>                                                                               | 1836       | 8.11   | 5.95   | 4.41   |                                       |
| Hex <sub>7</sub> HexNAc <sub>2</sub>                                                                                                | 1988       | 65.65  | 58.32  | 51.89  |                                       |
| Hex <sub>6</sub> HexNAc <sub>3</sub>                                                                                                | 2029       | 1.50   | 10.61  | 3.63   |                                       |
| Hex <sub>5</sub> HexNAc <sub>4</sub>                                                                                                | 2070       | 5.64   | 16.66  | 8.65   |                                       |
| Fuc <sub>1</sub> Hex <sub>3</sub> HexNAc <sub>5</sub>                                                                               | 2081       | 7.00   | 1.63   | 2.81   |                                       |
| Hex <sub>8</sub> HexNAc <sub>2</sub>                                                                                                | 2192       | 93.62  | 90.09  | 87.88  |                                       |
| Fuc <sub>1</sub> Hex <sub>5</sub> HexNAc <sub>4</sub>                                                                               | 2244       | 5.61   | 35.74* | 17.11* | *Desialylated product                 |
| Hex <sub>9</sub> HexNAc <sub>2</sub>                                                                                                | 2396       | 100.00 | 100.00 | 100.00 | <b>Relative intensity</b>             |
| Fuc <sub>1</sub> Hex <sub>6</sub> HexNAc <sub>4</sub>                                                                               | 2448       | 2.87   | 5.97   | 4.02   |                                       |
| Fuc <sub>1</sub> Hex <sub>5</sub> HexNAc <sub>5</sub>                                                                               | 2489       | 6.20   | 24.64* | 9.44*  | *Desialylated product                 |
| Hex <sub>6</sub> HexNAc <sub>5</sub>                                                                                                | 2519       | 2.12   | 10.32  | 3.14   |                                       |
| NeuAc <sub>1</sub> Fuc <sub>1</sub> Hex <sub>5</sub> HexNAc <sub>4</sub>                                                            | 2605       | 6.23   | 0.05** | 3.72   | ** $\alpha$ 2,6-Sia                   |
| NeuAc <sub>1</sub> Fuc <sub>1</sub> Hex <sub>5</sub> HexNAc <sub>4</sub><br>NeuAc <sub>1</sub> Hex <sub>6</sub> HexNAc <sub>4</sub> | 2635       | 7.35   | 0.07   | 1.49   |                                       |
| Fuc <sub>1</sub> Hex <sub>6</sub> HexNAc <sub>5</sub>                                                                               | 2693       | 6.63   | 42.03* | 16.83* | *Desialylated product                 |
| NeuAc <sub>1</sub> Fuc <sub>1</sub> Hex <sub>6</sub> HexNAc <sub>4</sub>                                                            | 2809       | 13.34  | 0.03** | 3.80   | ** $\alpha$ 2,6-Sia                   |
| Fuc <sub>2</sub> Hex <sub>6</sub> HexNAc <sub>5</sub>                                                                               | 2867       | 8.98   | 10.51  | 6.94   |                                       |
| Fuc <sub>1</sub> Hex <sub>7</sub> HexNAc <sub>5</sub>                                                                               | 2897       | 1.25   | 12.7*  | 5.98*  | *Desialylated product                 |
| Fuc <sub>1</sub> Hex <sub>6</sub> HexNAc <sub>6</sub>                                                                               | 2938       | 1.70   | 24.30* | 11.87* | *Desialylated product                 |
| NeuAc <sub>2</sub> Fuc <sub>1</sub> Hex <sub>5</sub> HexNAc <sub>4</sub>                                                            | 2966       | 7.42   | 0.03   | 0.17** | ** $\alpha$ 2,3- and $\alpha$ 2,6-Sia |
| Hex <sub>7</sub> HexNAc <sub>6</sub>                                                                                                | 2968       | 1.11   | 9.27   | 4.32   |                                       |
| NeuAc <sub>1</sub> Fuc <sub>1</sub> Hex <sub>6</sub> HexNAc <sub>5</sub>                                                            | 3054       | 8.16   | 0.04** | 5.32   | ** $\alpha$ 2,6-Sia                   |
| Fuc <sub>1</sub> Hex <sub>7</sub> HexNAc <sub>6</sub>                                                                               | 3143       | 2.75   | 82.28* | 55.00* | *Desialylated product                 |
| NeuAc <sub>2</sub> Fuc <sub>1</sub> Hex <sub>5</sub> HexNAc <sub>5</sub>                                                            | 3212       | 5.27   | 0.06   | 0.06   |                                       |
| NeuAc <sub>1</sub> Fuc <sub>1</sub> Hex <sub>6</sub> HexNAc <sub>6</sub>                                                            | 3299       | 2.64   | 0.04   | 0.25   |                                       |
| Fuc <sub>2</sub> Hex <sub>7</sub> HexNAc <sub>6</sub>                                                                               | 3316       | 1.90   | 9.88   | 6.80   |                                       |
| Fuc <sub>1</sub> Hex <sub>8</sub> HexNAc <sub>6</sub>                                                                               | 3347       | 4.40   | 28.02* | 10.86* | *Desialylated product                 |
| Fuc <sub>1</sub> Hex <sub>7</sub> HexNAc <sub>7</sub>                                                                               | 3388       | 0.67   | 19.02* | 8.35*  | *Desialylated product                 |
| NeuAc <sub>2</sub> Fuc <sub>1</sub> Hex <sub>6</sub> HexNAc <sub>5</sub>                                                            | 3416       | 1.94   | 0.06   | 0.15   |                                       |
| NeuAc <sub>1</sub> Fuc <sub>1</sub> Hex <sub>7</sub> HexNAc <sub>6</sub>                                                            | 3503       | 3.88   | 0.05** | 5.59   | ** $\alpha$ 2,6-Sia                   |
| Fuc <sub>1</sub> Hex <sub>8</sub> HexNAc <sub>7</sub>                                                                               | 3592       | 0.38   | 27.48* | 9.14*  | *Desialylated product                 |
| NeuAc <sub>2</sub> Fuc <sub>1</sub> Hex <sub>6</sub> HexNAc <sub>6</sub>                                                            | 3661       | 1.93   | 0.15   | 0.05   |                                       |
| NeuAc <sub>1</sub> Fuc <sub>1</sub> Hex <sub>8</sub> HexNAc <sub>6</sub>                                                            | 3708       | 2.46   | 0.08** | 2.04   | ** $\alpha$ 2,6-Sia                   |
| Fuc <sub>2</sub> Hex <sub>8</sub> HexNAc <sub>7</sub>                                                                               | 3766       | 1.91   | 10.91  | 5.59   |                                       |
| Fuc <sub>1</sub> Hex <sub>9</sub> HexNAc <sub>7</sub>                                                                               | 3796       | 2.34   | 18.28* | 6.05   | *Desialylated product                 |
| NeuAc <sub>2</sub> Fuc <sub>1</sub> Hex <sub>7</sub> HexNAc <sub>6</sub>                                                            | 3865       | 6.38   | 0.51   | 0.04** | ** $\alpha$ 2,3- and $\alpha$ 2,6-Sia |
| NeuAc <sub>1</sub> Fuc <sub>1</sub> Hex <sub>8</sub> HexNAc <sub>7</sub>                                                            | 3953       | 2.06   | 0.10   | 0.53   |                                       |
| Fuc <sub>2</sub> Hex <sub>9</sub> HexNAc <sub>7</sub>                                                                               | 3970       | 1.36   | 5.86   | 3.45   |                                       |
| Fuc <sub>1</sub> Hex <sub>10</sub> HexNAc <sub>7</sub>                                                                              | 4000       | 0.68   | 3.31   | 0.59   |                                       |
| Fuc <sub>1</sub> Hex <sub>9</sub> HexNAc <sub>8</sub>                                                                               | 4041       | 0.91   | 8.61*  | 2.33*  | *Desialylated product                 |

### Supplementary Table 3

List of representative peaks of N-glycans by MALDI-TOF-MS analysis in MDCK cell line

| Composition                                                               | Mass (m/z) | Non<br>% | MDCK      |           | Remarks                               |
|---------------------------------------------------------------------------|------------|----------|-----------|-----------|---------------------------------------|
|                                                                           |            |          | NeuA<br>% | NeuS<br>% |                                       |
| NeuAc <sub>1</sub> Fuc <sub>1</sub> Hex <sub>9</sub> HexNAc <sub>7</sub>  | 4157       | 1.41     | 0.05      | 0.88      |                                       |
| Fuc <sub>2</sub> Hex <sub>9</sub> HexNAc <sub>8</sub>                     | 4215       | 0.73     | 3.83      | 1.22      |                                       |
| NeuAc <sub>3</sub> Fuc <sub>1</sub> Hex <sub>7</sub> HexNAc <sub>6</sub>  | 4226       | 2.27     | 0.03**    | 0.12**    | ** $\alpha$ 2,3- and $\alpha$ 2,6-Sia |
| Fuc <sub>1</sub> Hex <sub>10</sub> HexNAc <sub>8</sub>                    | 4246       | 0.27     | 2.05      | 1.54      |                                       |
| NeuAc <sub>1</sub> Fuc <sub>1</sub> Hex <sub>9</sub> HexNAc <sub>8</sub>  | 4403       | 0.93     | 0.19      | 0.53      |                                       |
| Fuc <sub>2</sub> Hex <sub>10</sub> HexNAc <sub>8</sub>                    | 4420       | 0.42     | 0.75      | 0.67      |                                       |
| Fuc <sub>1</sub> Hex <sub>10</sub> HexNAc <sub>9</sub>                    | 4491       | 0.56     | 1.13      | 0.54      |                                       |
| NeuAc <sub>4</sub> Fuc <sub>1</sub> Hex <sub>7</sub> HexNAc <sub>6</sub>  | 4587       | 3.04     | 0.02**    | 0.04**    | ** $\alpha$ 2,3- and $\alpha$ 2,6-Sia |
| NeuAc <sub>1</sub> Fuc <sub>1</sub> Hex <sub>10</sub> HexNAc <sub>8</sub> | 4607       | 0.56     | 0.03      | 0.52      |                                       |
| Fuc <sub>2</sub> Hex <sub>10</sub> HexNAc <sub>9</sub>                    | 4665       | 0.10     | 0.36      | 0.05      |                                       |
| NeuAc <sub>3</sub> Fuc <sub>1</sub> Hex <sub>8</sub> HexNAc <sub>7</sub>  | 4675       | 1.74     | 0.02      | 0.05      |                                       |
| Fuc <sub>1</sub> Hex <sub>11</sub> HexNAc <sub>9</sub>                    | 4696       | 0.07     | 0.38      | 0.16      |                                       |
| Fuc <sub>1</sub> Hex <sub>11</sub> HexNAc <sub>10</sub>                   | 4939       | 0.24     | 0.14      | 0.08      |                                       |
| Fuc <sub>1</sub> Hex <sub>12</sub> HexNAc <sub>10</sub>                   | 5145       | 0.05     | 0.04      | 0.05      |                                       |
| Fuc <sub>1</sub> Hex <sub>12</sub> HexNAc <sub>11</sub>                   | 5388       | 0.09     | 0.09      | 0.03      |                                       |
| Fuc <sub>1</sub> Hex <sub>13</sub> HexNAc <sub>11</sub>                   | 5595       | 0.01     | 0.02      | 0.02      |                                       |
