# Supplementary material for: Sialylated and sulfated N-Glycans in MDCK and engineered MDCK cells for influenza virus studies
Source: PubMed Central journal article supplement (PMC9325728; doi:10.1038/s41598-022-16605-5), 2022-07-26
Supplement: 41598_2022_16605_MOESM4_ESM.pdf [file 41598_2022_16605_MOESM4_ESM.pdf]

## Supplementary Table 4

List of representative peaks of N-glycans by MALDI-TOF-MS analysis in SIAT1 cell line

| Composition                                                              | Mass (m/z) | Non %  | SIAT1  |        | Remarks                   |
|--------------------------------------------------------------------------|------------|--------|--------|--------|---------------------------|
|                                                                          |            |        | NeuA % | NeuS % |                           |
| Hex <sub>5</sub> HexNAc <sub>2</sub>                                     | 1580       | 20.96  | 14.32  | 6.98   |                           |
| Hex <sub>6</sub> HexNAc <sub>2</sub>                                     | 1784       | 55.89  | 49.40  | 27.54  |                           |
| Fuc <sub>1</sub> Hex <sub>3</sub> HexNAc <sub>4</sub>                    | 1836       | 5.51   | 0.14   | 2.00   |                           |
| Hex <sub>7</sub> HexNAc <sub>2</sub>                                     | 1988       | 52.65  | 40.21  | 27.55  |                           |
| Hex <sub>6</sub> HexNAc <sub>3</sub>                                     | 2029       | 0.72   | 11.36  | 0.53   |                           |
| Hex <sub>5</sub> HexNAc <sub>4</sub>                                     | 2070       | 5.26   | 23.93* | 13.26* | *Product from 2792        |
| Fuc <sub>1</sub> Hex <sub>3</sub> HexNAc <sub>5</sub>                    | 2081       | 5.37   | 0.68   | 1.68   |                           |
| Hex <sub>8</sub> HexNAc <sub>2</sub>                                     | 2192       | 88.87  | 84.60  | 58.15  |                           |
| Fuc <sub>1</sub> Hex <sub>5</sub> HexNAc <sub>4</sub>                    | 2244       | 4.60   | 59.77* | 17.16  | *Product from 2966        |
| Hex <sub>5</sub> HexNAc <sub>5</sub>                                     | 2315       | 0.75   | 15.23* | 0.31   | *Product from 3037        |
| Hex <sub>9</sub> HexNAc <sub>2</sub>                                     | 2396       | 100.00 | 100.00 | 100.00 | <b>Relative intensity</b> |
| Fuc <sub>1</sub> Hex <sub>5</sub> HexNAc <sub>5</sub>                    | 2489       | 0.94   | 68.16* | 0.57   | *Product from 2850/3212   |
| Hex <sub>6</sub> HexNAc <sub>5</sub>                                     | 2519       | 0.49   | 13.14  | 0.32   |                           |
| Hex <sub>10</sub> HexNAc <sub>2</sub>                                    | 2600       | 0.73   | 2.62   | 5.42   |                           |
| NeuAc <sub>1</sub> Fuc <sub>1</sub> Hex <sub>5</sub> HexNAc <sub>4</sub> | 2605       | 7.62   | 0.10   | 1.82   |                           |
| NeuAc <sub>1</sub> Fuc <sub>1</sub> Hex <sub>5</sub> HexNAc <sub>4</sub> | 2635       | 5.77   | 0.12   | 1.59   |                           |
| NeuAc <sub>1</sub> Hex <sub>6</sub> HexNAc <sub>4</sub>                  | 2635       | 5.77   | 0.12   | 1.59   |                           |
| Fuc <sub>1</sub> Hex <sub>6</sub> HexNAc <sub>5</sub>                    | 2693       | 0.54   | 49.19* | 0.92   | *Product from 3777        |
| Hex <sub>6</sub> HexNAc <sub>6</sub>                                     | 2764       | 0.10   | 13.82  | 0.11   |                           |
| NeuAc <sub>2</sub> Hex <sub>5</sub> HexNAc <sub>4</sub>                  | 2792       | 7.04   | 0.18   | 1.34   |                           |
| NeuAc <sub>1</sub> Fuc <sub>1</sub> Hex <sub>5</sub> HexNAc <sub>5</sub> | 2850       | 5.76   | 0.14** | 3.44   | ** $\alpha$ 2,6-Sia       |
| Fuc <sub>1</sub> Hex <sub>6</sub> HexNAc <sub>6</sub>                    | 2938       | 0.86   | 88.49* | 0.41   | *Product from 3661/4022   |
| NeuAc <sub>2</sub> Fuc <sub>1</sub> Hex <sub>5</sub> HexNAc <sub>4</sub> | 2966       | 17.23  | 0.11** | 14.61  | ** $\alpha$ 2,6-Sia       |
| Hex <sub>7</sub> HexNAc <sub>6</sub>                                     | 2968       | 2.20   | 4.64   | 6.47   |                           |
| NeuAc <sub>2</sub> Hex <sub>5</sub> HexNAc <sub>5</sub>                  | 3037       | 6.64   | 0.15   | 2.75   |                           |
| NeuAc <sub>1</sub> Fuc <sub>1</sub> Hex <sub>6</sub> HexNAc <sub>5</sub> | 3054       | 5.55   | 0.10** | 4.37   | ** $\alpha$ 2,6-Sia       |
| Fuc <sub>1</sub> Hex <sub>7</sub> HexNAc <sub>6</sub>                    | 3143       | 1.18   | 32.64* | 0.96   | *Product from 3504/3865   |
| NeuAc <sub>2</sub> Fuc <sub>1</sub> Hex <sub>5</sub> HexNAc <sub>5</sub> | 3212       | 39.75  | 0.12** | 31.28  | ** $\alpha$ 2,6-Sia       |
| NeuAc <sub>1</sub> Fuc <sub>1</sub> Hex <sub>6</sub> HexNAc <sub>6</sub> | 3300       | 1.14   | 0.13   | 9.04   |                           |
| Fuc <sub>2</sub> Hex <sub>7</sub> HexNAc <sub>6</sub>                    | 3316       | 0.78   | 1.27   | 0.72   |                           |
| Fuc <sub>1</sub> Hex <sub>8</sub> HexNAc <sub>6</sub>                    | 3347       | 0.26   | 2.89   | 0.31   |                           |
| Fuc <sub>1</sub> Hex <sub>7</sub> HexNAc <sub>7</sub>                    | 3388       | 0.89   | 15.64  | 0.34   |                           |
| NeuAc <sub>2</sub> Fuc <sub>1</sub> Hex <sub>6</sub> HexNAc <sub>5</sub> | 3416       | 4.82   | 0.11   | 15.91* | *Product from 3777        |
| Hex <sub>8</sub> HexNAc <sub>7</sub>                                     | 3418       | 4.00   | 1.01   | 2.33   | and $\alpha$ 2,6-Sia      |
| NeuAc <sub>1</sub> Fuc <sub>1</sub> Hex <sub>7</sub> HexNAc <sub>6</sub> | 3504       | 1.34   | 0.06   | 12.59* | *Product from 4226/4587   |
| Fuc <sub>1</sub> Hex <sub>8</sub> HexNAc <sub>7</sub>                    | 3592       | 1.00   | 14.48  | 1.11   | and $\alpha$ 2,6-Sia      |
| NeuAc <sub>2</sub> Fuc <sub>1</sub> Hex <sub>6</sub> HexNAc <sub>6</sub> | 3661       | 8.78   | 0.10   | 35.27* | *Product from 4022        |
| NeuAc <sub>1</sub> Fuc <sub>1</sub> Hex <sub>7</sub> HexNAc <sub>7</sub> | 3749       | 0.57   | 0.08   | 6.83   | and $\alpha$ 2,6-Sia      |
| Fuc <sub>2</sub> Hex <sub>8</sub> HexNAc <sub>7</sub>                    | 3766       | 1.18   | 0.50   | 0.64   |                           |
| NeuAc <sub>3</sub> Fuc <sub>1</sub> Hex <sub>6</sub> HexNAc <sub>5</sub> | 3777       | 12.24  | 0.05   | 2.35   |                           |
| Fuc <sub>1</sub> Hex <sub>9</sub> HexNAc <sub>7</sub>                    | 3796       | 0.67   | 1.03   | 0.18   |                           |
| Fuc <sub>1</sub> Hex <sub>8</sub> HexNAc <sub>8</sub>                    | 3837       | 1.97   | 0.20   | 0.02   |                           |
| NeuAc <sub>2</sub> Fuc <sub>1</sub> Hex <sub>7</sub> HexNAc <sub>6</sub> | 3865       | 6.43   | 0.09** | 9.04   | ** $\alpha$ 2,6-Sia       |

## Supplementary Table 4

List of representative peaks of N-glycans by MALDI-TOF-MS analysis in SIAT1 cell line

| Composition                                                               | Mass (m/z) | Non<br>% | SIAT1     |           | Remarks                               |
|---------------------------------------------------------------------------|------------|----------|-----------|-----------|---------------------------------------|
|                                                                           |            |          | NeuA<br>% | NeuS<br>% |                                       |
| Hex <sub>9</sub> HexNAc <sub>8</sub>                                      | 3867       | 6.67     | 1.06      | 2.90      |                                       |
| NeuAc <sub>1</sub> Fuc <sub>1</sub> Hex <sub>8</sub> HexNAc <sub>7</sub>  | 3953       | 0.88     | 0.08      | 6.87      |                                       |
| NeuAc <sub>3</sub> Fuc <sub>1</sub> Hex <sub>6</sub> HexNAc <sub>6</sub>  | 4022       | 18.94    | 0.09**    | 1.36**    | ** $\alpha$ 2,3- and $\alpha$ 2,6-Sia |
| Fuc <sub>1</sub> Hex <sub>9</sub> HexNAc <sub>8</sub>                     | 4041       | 0.73     | 7.00      | 0.33      |                                       |
| NeuAc <sub>2</sub> Fuc <sub>1</sub> Hex <sub>7</sub> HexNAc <sub>7</sub>  | 4111       | 0.91     | 0.07      | 3.03      |                                       |
| Fuc <sub>2</sub> Hex <sub>9</sub> HexNAc <sub>8</sub>                     | 4215       | 0.11     | 0.31      | 0.11      |                                       |
| NeuAc <sub>3</sub> Fuc <sub>1</sub> Hex <sub>7</sub> HexNAc <sub>6</sub>  | 4226       | 2.67     | 0.08      | 0.71      |                                       |
| Fuc <sub>1</sub> Hex <sub>10</sub> HexNAc <sub>8</sub>                    | 4246       | 0.09     | 0.25      | 0.03      |                                       |
| Fuc <sub>1</sub> Hex <sub>9</sub> HexNAc <sub>9</sub>                     | 4286       | 0.19     | 0.23      | 0.06      |                                       |
| NeuAc <sub>2</sub> Fuc <sub>1</sub> Hex <sub>8</sub> HexNAc <sub>7</sub>  | 4314       | 1.41     | 0.17      | 4.34      |                                       |
| NeuAc <sub>1</sub> Fuc <sub>1</sub> Hex <sub>9</sub> HexNAc <sub>8</sub>  | 4403       | 0.50     | 0.07      | 0.47      |                                       |
| NeuAc <sub>3</sub> Fuc <sub>1</sub> Hex <sub>7</sub> HexNAc <sub>7</sub>  | 4471       | 1.29     | 0.06      | 0.27      |                                       |
| Fuc <sub>1</sub> Hex <sub>10</sub> HexNAc <sub>9</sub>                    | 4491       | 0.19     | 0.95      | 0.08      |                                       |
| NeuAc <sub>2</sub> Hex <sub>8</sub> HexNAc <sub>8</sub>                   | 4559       | 0.15     | 0.06      | 0.75      |                                       |
| NeuAc <sub>4</sub> Fuc <sub>1</sub> Hex <sub>7</sub> HexNAc <sub>6</sub>  | 4587       | 1.98     | 0.07      | 0.20      |                                       |
| Fuc <sub>2</sub> Hex <sub>10</sub> HexNAc <sub>9</sub>                    | 4665       | 0.14     | 0.11      | 0.06      |                                       |
| NeuAc <sub>3</sub> Fuc <sub>1</sub> Hex <sub>8</sub> HexNAc <sub>7</sub>  | 4675       | 3.68     | 0.06      | 0.16      |                                       |
| Fuc <sub>1</sub> Hex <sub>11</sub> HexNAc <sub>9</sub>                    | 4696       | 0.08     | 0.09      | 0.04      |                                       |
| NeuAc <sub>2</sub> Fuc <sub>1</sub> Hex <sub>9</sub> HexNAc <sub>8</sub>  | 4764       | 0.12     | 0.08      | 2.36      |                                       |
| Fuc <sub>1</sub> Hex <sub>11</sub> HexNAc <sub>10</sub>                   | 4939       | 0.05     | 0.19      | 0.03      |                                       |
| NeuAc <sub>4</sub> Fuc <sub>1</sub> Hex <sub>8</sub> HexNAc <sub>7</sub>  | 5036       | 0.86     | 0.06      | 0.09      |                                       |
| NeuAc <sub>3</sub> Fuc <sub>1</sub> Hex <sub>9</sub> HexNAc <sub>8</sub>  | 5125       | 1.22     | 0.06      | 1.06      |                                       |
| NeuAc <sub>2</sub> Fuc <sub>1</sub> Hex <sub>10</sub> HexNAc <sub>9</sub> | 5213       | 0.04     | 0.07      | 0.17      |                                       |
| Fuc <sub>1</sub> Hex <sub>12</sub> HexNAc <sub>11</sub>                   | 5388       | 0.02     | 0.08      | 0.03      |                                       |
| NeuAc <sub>4</sub> Fuc <sub>1</sub> Hex <sub>9</sub> HexNAc <sub>8</sub>  | 5487       | 0.34     | 0.05      | 0.03      |                                       |
| NeuAc <sub>3</sub> Fuc <sub>1</sub> Hex <sub>10</sub> HexNAc <sub>9</sub> | 5574       | 0.06     | 0.10      | 0.08      |                                       |
| Fuc <sub>1</sub> Hex <sub>13</sub> HexNAc <sub>12</sub>                   | 5838       | 0.01     | 0.05      | 0.02      |                                       |
| NeuAc <sub>4</sub> Fuc <sub>1</sub> Hex <sub>10</sub> HexNAc <sub>9</sub> | 5935       | 0.10     | 0.07      | 0.03      |                                       |
