# Supplementary material for: Sialylated and sulfated N-Glycans in MDCK and engineered MDCK cells for influenza virus studies
Source: PubMed Central journal article supplement (PMC9325728; doi:10.1038/s41598-022-16605-5), 2022-07-26
Supplement: 41598_2022_16605_MOESM5_ESM.pdf [file 41598_2022_16605_MOESM5_ESM.pdf]

## Supplementary Table 5

List of representative peaks of N-glycans by MALDI-TOF-MS analysis in hCK cell line

| Composition                                                              | Mass (m/z) | Non<br>% | hCK       |           | Remarks                                         |
|--------------------------------------------------------------------------|------------|----------|-----------|-----------|-------------------------------------------------|
|                                                                          |            |          | NeuA<br>% | NeuS<br>% |                                                 |
| Hex <sub>5</sub> HexNAc <sub>2</sub>                                     | 1580       | 43.64    | 42.30     | 25.07     |                                                 |
| Hex <sub>6</sub> HexNAc <sub>2</sub>                                     | 1784       | 64.88    | 74.67     | 49.50     |                                                 |
| Fuc <sub>1</sub> Hex <sub>3</sub> HexNAc <sub>4</sub>                    | 1836       | 12.58    | 6.81      | 3.32      |                                                 |
| Hex <sub>7</sub> HexNAc <sub>2</sub>                                     | 1988       | 73.28    | 65.83     | 52.72     |                                                 |
| Hex <sub>5</sub> HexNAc <sub>4</sub>                                     | 2070       | 5.31     | 45.39     | 5.01      |                                                 |
| Fuc <sub>1</sub> Hex <sub>3</sub> HexNAc <sub>5</sub>                    | 2081       | 14.62    | 6.67      | 0.23      |                                                 |
| NeuAc <sub>1</sub> Fuc <sub>1</sub> Hex <sub>4</sub> HexNAc <sub>3</sub> | 2156       | 17.68    | 0.20      | 6.29      |                                                 |
| Hex <sub>8</sub> HexNAc <sub>2</sub>                                     | 2192       | 88.59    | 78.37     | 67.43     |                                                 |
| Fuc <sub>1</sub> Hex <sub>5</sub> HexNAc <sub>4</sub>                    | 2244       | 5.61     | 91.03*    | 6.87      | *Product from 2605/2966                         |
| Fuc <sub>1</sub> Hex <sub>4</sub> HexNAc <sub>5</sub>                    | 2285       | 2.81     | 18.77     | 0.59      |                                                 |
| Fuc <sub>1</sub> Hex <sub>3</sub> HexNAc <sub>6</sub>                    | 2326       | 9.37     | 6.00      | 1.93      |                                                 |
| Hex <sub>9</sub> HexNAc <sub>2</sub>                                     | 2396       | 100.00   | 100.00    | 100.00    | <b>Relative intensity</b>                       |
| Fuc <sub>1</sub> Hex <sub>5</sub> HexNAc <sub>5</sub>                    | 2489       | 1.21     | 37.21*    | 0.46      | *Product from 2850/3212                         |
| Hex <sub>6</sub> HexNAc <sub>5</sub>                                     | 2519       | 0.75     | 9.58      | 0.21      |                                                 |
| NeuAc <sub>1</sub> Fuc <sub>1</sub> Hex <sub>5</sub> HexNAc <sub>4</sub> | 2605       | 9.61     | 0.37      | 3.01      |                                                 |
| NeuAc <sub>1</sub> Fuc <sub>1</sub> Hex <sub>4</sub> HexNAc <sub>5</sub> | 2646       | 8.25     | 0.03      | 3.48      |                                                 |
| Fuc <sub>1</sub> Hex <sub>6</sub> HexNAc <sub>5</sub>                    | 2693       | 0.95     | 33.33*    | 0.39      | *Product from 3054/3777                         |
| Fuc <sub>1</sub> Hex <sub>5</sub> HexNAc <sub>6</sub>                    | 2734       | 1.02     | 7.71      | 0.29      |                                                 |
| Hex <sub>6</sub> HexNAc <sub>6</sub>                                     | 2764       | 0.64     | 14.32     | 0.18      |                                                 |
| NeuAc <sub>2</sub> Hex <sub>5</sub> HexNAc <sub>4</sub>                  | 2792       | 6.87     | 0.04**    | 5.47      | ** α <sub>2</sub> ,6-Sia                        |
| NeuAc <sub>1</sub> Fuc <sub>1</sub> Hex <sub>5</sub> HexNAc <sub>5</sub> | 2850       | 4.52     | 0.03      | 1.60      |                                                 |
| Fuc <sub>1</sub> Hex <sub>6</sub> HexNAc <sub>6</sub>                    | 2938       | 0.67     | 42.96     | 0.30      | *Product from 3661/4022                         |
| NeuAc <sub>2</sub> Fuc <sub>1</sub> Hex <sub>5</sub> HexNAc <sub>4</sub> | 2966       | 22.40    | 0.23**    | 29.23     | ** α <sub>2</sub> ,6-Sia                        |
| Hex <sub>7</sub> HexNAc <sub>6</sub>                                     | 2968       | 12.75    | 31.10     | 19.93     |                                                 |
| NeuAc <sub>1</sub> Fuc <sub>1</sub> Hex <sub>6</sub> HexNAc <sub>5</sub> | 3054       | 2.78     | 0.05      | 1.98      |                                                 |
| Fuc <sub>1</sub> Hex <sub>7</sub> HexNAc <sub>6</sub>                    | 3143       | 0.79     | 82.43*    | 0.39      | *Product from 3504/3865                         |
| NeuAc <sub>2</sub> Fuc <sub>1</sub> Hex <sub>5</sub> HexNAc <sub>5</sub> | 3212       | 11.33    | 0.08**    | 7.81      | ** α <sub>2</sub> ,6-Sia                        |
| NeuAc <sub>1</sub> Fuc <sub>1</sub> Hex <sub>6</sub> HexNAc <sub>6</sub> | 3298       | 2.69     | 0.08      | 1.08      |                                                 |
| Fuc <sub>2</sub> Hex <sub>7</sub> HexNAc <sub>6</sub>                    | 3317       | 0.87     | 2.36      | 0.20      |                                                 |
| Fuc <sub>1</sub> Hex <sub>8</sub> HexNAc <sub>6</sub>                    | 3347       | 0.29     | 17.16     | 0.09      |                                                 |
| Fuc <sub>1</sub> Hex <sub>7</sub> HexNAc <sub>7</sub>                    | 3388       | 0.27     | 19.15     | 0.12      |                                                 |
| NeuAc <sub>2</sub> Fuc <sub>1</sub> Hex <sub>6</sub> HexNAc <sub>5</sub> | 3416       | 2.86     | 0.08**    | 4.42      | ** α <sub>2</sub> ,6-Sia                        |
| Hex <sub>8</sub> HexNAc <sub>7</sub>                                     | 3418       | 2.86     | 3.72      | 2.33      |                                                 |
| NeuAc <sub>1</sub> Fuc <sub>1</sub> Hex <sub>7</sub> HexNAc <sub>6</sub> | 3504       | 2.67     | 0.03**    | 2.99      | ** α <sub>2</sub> ,6-Sia                        |
| Fuc <sub>1</sub> Hex <sub>8</sub> HexNAc <sub>7</sub>                    | 3592       | 0.43     | 26.88     | 0.48      |                                                 |
| NeuAc <sub>2</sub> Fuc <sub>1</sub> Hex <sub>6</sub> HexNAc <sub>6</sub> | 3661       | 3.51     | 0.17**    | 4.32      | ** α <sub>2</sub> ,6-Sia                        |
| Fuc <sub>2</sub> Hex <sub>8</sub> HexNAc <sub>7</sub>                    | 3766       | 1.83     | 1.68      | 0.08      |                                                 |
| NeuAc <sub>3</sub> Fuc <sub>1</sub> Hex <sub>6</sub> HexNAc <sub>5</sub> | 3777       | 2.79     | 0.02      | 1.86      |                                                 |
| Fuc <sub>1</sub> Hex <sub>9</sub> HexNAc <sub>7</sub>                    | 3796       | 0.35     | 4.35      | 0.08      |                                                 |
| Hex <sub>9</sub> HexNAc <sub>8</sub>                                     | 3837       | 0.37     | 0.72      | 0.29      |                                                 |
| NeuAc <sub>2</sub> Fuc <sub>1</sub> Hex <sub>7</sub> HexNAc <sub>6</sub> | 3865       | 6.71     | 0.02**    | 7.81      | ** α <sub>2</sub> ,6-Sia                        |
| Hex <sub>9</sub> HexNAc <sub>8</sub>                                     | 3867       | 9.75     | 2.55      | 2.34      |                                                 |
| NeuAc <sub>3</sub> Fuc <sub>1</sub> Hex <sub>6</sub> HexNAc <sub>6</sub> | 4022       | 1.82     | 0.03      | 0.67      | ** α <sub>2</sub> ,3- and α <sub>2</sub> ,6-Sia |

## Supplementary Table 5

List of representative peaks of N-glycans by MALDI-TOF-MS analysis in hCK cell line

| Composition               | Mass (m/z) | Non<br>% | hCK       |           | Remarks                               |
|---------------------------|------------|----------|-----------|-----------|---------------------------------------|
|                           |            |          | NeuA<br>% | NeuS<br>% |                                       |
| Fuc1 Hex9 HexNAc8         | 4041       | 1.07     | 13.24     | 0.33      |                                       |
| NeuAc2 Fuc1 Hex8 HexNAc6  | 4069       | 1.15     | 0.10      | 1.15      |                                       |
| Fuc2 Hex9 HexNAc8         | 4215       | 0.36     | 0.77      | 0.03      |                                       |
| NeuAc3 Fuc1 Hex7 HexNAc6  | 4226       | 3.97     | 0.08      | 2.45      |                                       |
| Fuc1 Hex10 HexNAc8        | 4246       | 0.24     | 0.73      | 0.04      |                                       |
| Fuc1 Hex9 HexNAc9         | 4286       | 0.12     | 0.51      | 0.01      |                                       |
| NeuAc2 Fuc1 Hex8 HexNAc7  | 4314       | 1.77     | 0.04      | 0.86      |                                       |
| Hex10 HexNAc9             | 4316       | 0.40     | 1.21      | 0.74      | ** $\alpha$ 2,3- and $\alpha$ 2,6-Sia |
| Fuc1 Hex10 HexNAc9        | 4491       | 0.19     | 5.62      | 0.07      |                                       |
| NeuAc4 Fuc1 Hex7 HexNAc6  | 4587       | 1.64     | 0.02**    | 0.05**    | ** $\alpha$ 2,3- and $\alpha$ 2,6-Sia |
| Fuc2 Hex10 HexNAc9        | 4665       | 0.02     | 0.24      | 0.03      |                                       |
| NeuAc3 Fuc1 Hex8 HexNAc7  | 4675       | 2.00     | 0.03      | 0.66      |                                       |
| Fuc1 Hex10 HexNAc9        | 4695       | 0.01     | 0.12      | 0.01      |                                       |
| NeuAc2 Fuc1 Hex9 HexNAc8  | 4763       | 0.08     | 0.18      | 0.15      |                                       |
| Fuc1 Hex11 HexNAc10       | 4939       | 0.02     | 1.89      | 0.02      |                                       |
| NeuAc3 Fuc1 Hex9 HexNAc8  | 5125       | 0.46     | 0.03      | 0.22      |                                       |
| Fuc1 Hex12 HexNAc11       | 5388       | 0.01     | 0.16      | 0.02      |                                       |
| NeuAc3 Fuc1 Hex10 HexNAc9 | 5574       | 0.03     | 0.02      | 0.05      |                                       |
| Fuc1 Hex13 HexNAc12       | 5838       | < 0.01   | 0.02      | 0.02      |                                       |
